# Supplementary material for: Base-modified factor VIII mRNA delivery with galactosylated lipid nanoparticles as a protein replacement therapy for haemophilia A
Source: Royal Society of Chemistry journal article supplement (doi:10.1039/d4bm00909f), 2024-01-01
Supplement: d4bm00909f1.pdf [file d4bm00909f1.pdf]

## **Base-modified Factor VIII mRNA delivery with Galactosylated lipid nanoparticles as a protein replacement therapy for Haemophilia A**

Porkizhi Arjunan<sup>a,b#</sup>, Gokulnath Mahalingam<sup>a#</sup>, Priyanka Sankar<sup>a#</sup>, Durga Kathirvelu<sup>a</sup>,  
Sevanthy Suresh<sup>a</sup>, Sandya Rani<sup>a</sup>, Kumarasamypet M Mohankumar<sup>a</sup>, Saravanabhavan  
Thangavel<sup>a</sup>, Srujan Marepally<sup>a\*</sup>

a Centre for Stem Cell Research (CSCR) (a unit of inStem, Bengaluru), CMC Campus, Vellore,  
632002, TN, India

b Manipal Academy of Higher Education, Manipal, Karnataka 576104, India.

# PA, GM, and PS contributed equally to this work

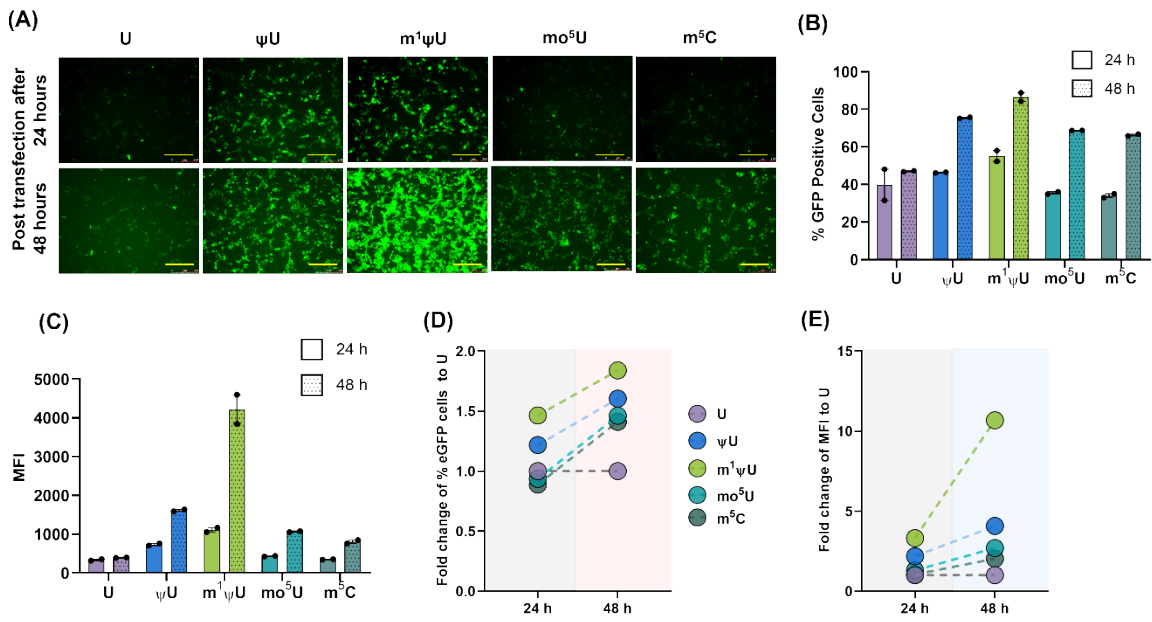

**Figure S1: Functional analysis of unmodified and base modified eGFP mRNAs in HEK-293T cell lines.** After transfection in HEK-293T cells, depth of translation efficiencies between unmodified and base modified eGFP mRNAs were determined by fluorescent microscopy and the scale bar indicates 250 μm (A) and % of eGFP positive cells (B) and MFI (C) were quantified by flow cytometry at 24 and 48 hours. Fold change of % eGFP positive cells (D) and MFI (E) between unmodified and base modified of eGFP mRNAs. (n = 2); (statistical significance compared to U-eGFP mRNA given in Table S1).

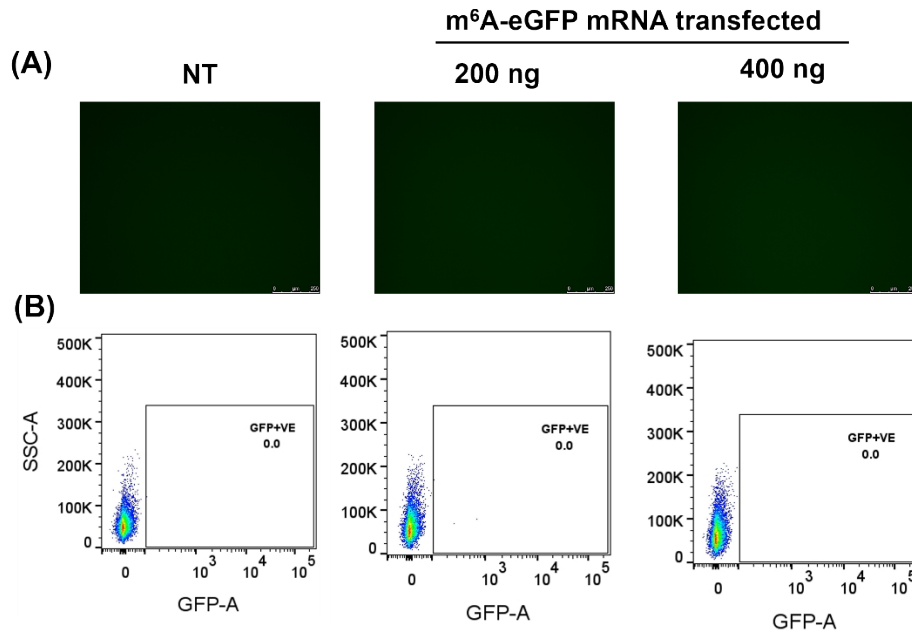

**Figure S2:** Transfection of m<sup>6</sup>A eGFP mRNA in HEK-293T cell line (A) Fluorescent images and (B) GFP positive population (analysed by flow cytometry) of non-transfected (NT) HEK-293T cells in comparison with HEK-293T cells transfected with m<sup>6</sup>A eGFP mRNA 2 days post-transfection.

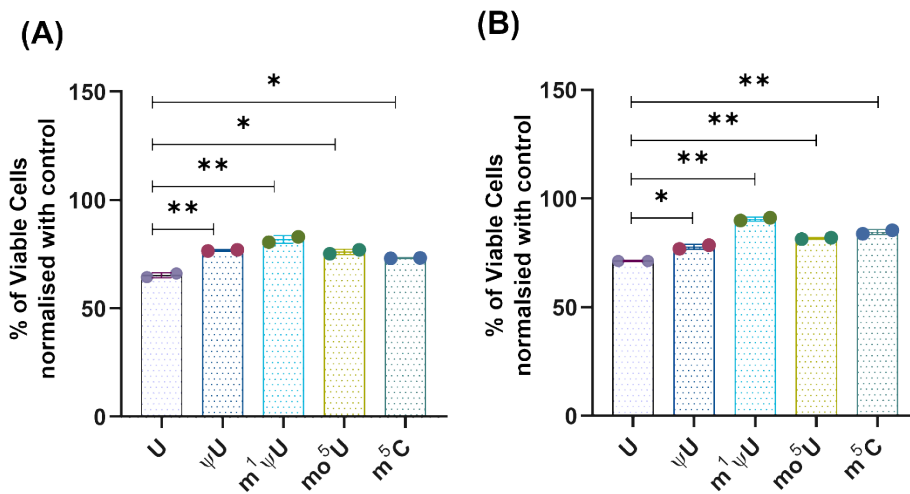

**Figure S3:** Toxicity levels of each base-modified eGFP mRNAs were analysed in SK-HEP-1 (A) and Hepa 1-6 (B) cell lines by MTT assay after 48 hours post-transfection. \* $p \leq 0.05$  \*\* $p \leq 0.01$  compared with U-eGFP mRNA.

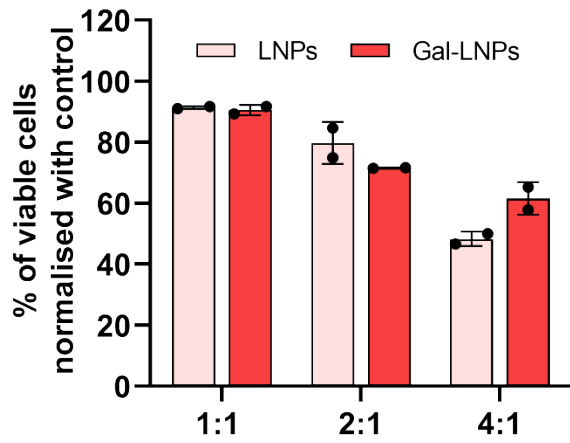

**Figure S4:** Toxicity levels of LNP and Gal-LNP in SK-HEP-1 cell lines by MTT assay after 48 hours post-transfection (n=2).

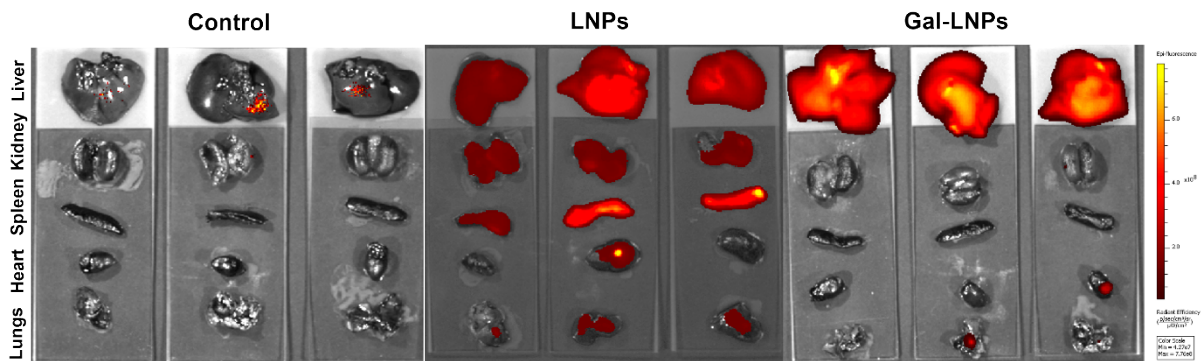

**Figure S5:** Localisation of LNP and Gal-LNP in mice evaluated by *In-Vivo* Imaging System (IVIS) (n=3).

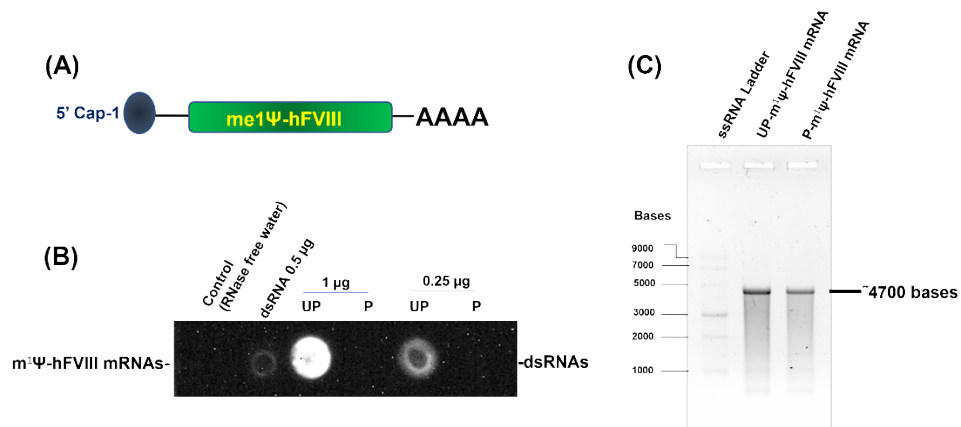

**Figure S6:** Schematic diagram of m<sup>1</sup>ΨU- modified FVIII mRNA (A). The RNA Dot-Blot analysis of purified m<sup>1</sup>ΨU- modified FVIII mRNAs (B). The integrity of synthesized (unpurified, UP) and dsRNA removed (purified, P) m<sup>1</sup>ΨU- modified FVIII mRNAs were analysed in RNA agarose electrophoresis (C).

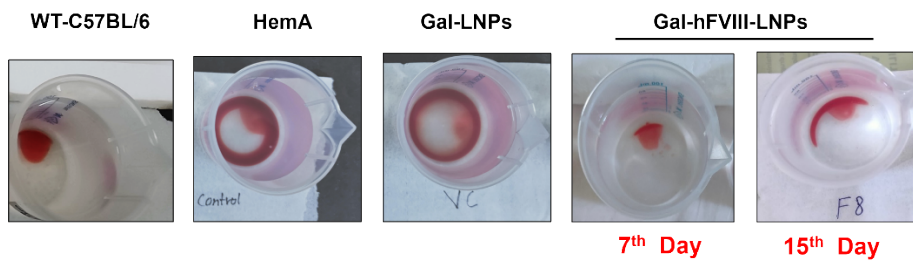

**Figure S7:** Photographic images of tail vein transverse assay.

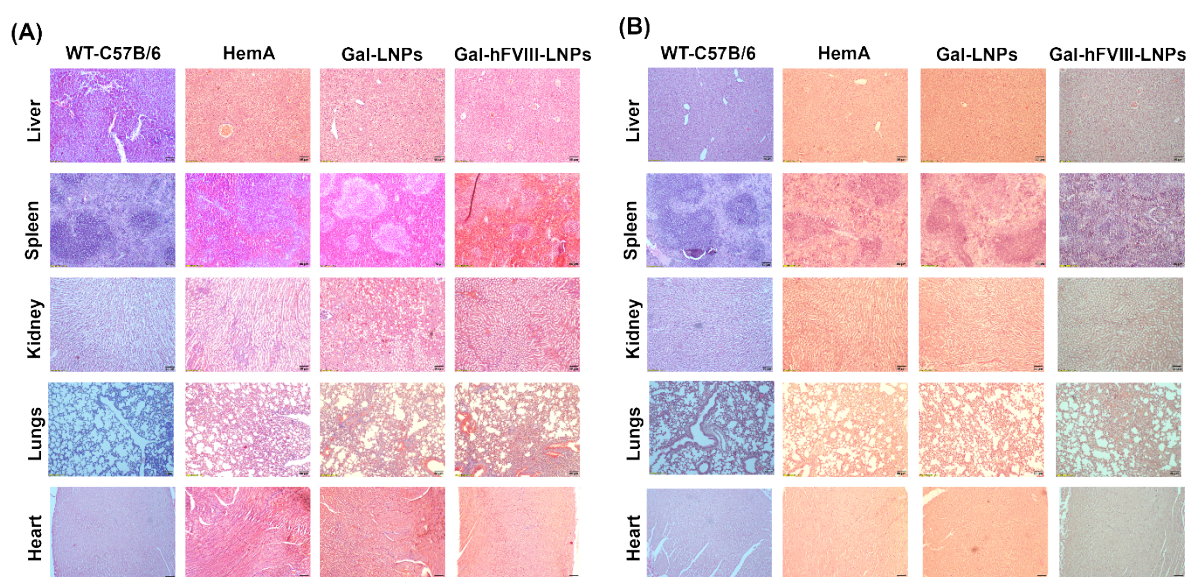

**Figure S8:** Mason trichrome staining of WT-C57B/6, HemaA, Gal-LNPs -Vehicle control (VC) and Gal-hFVIII-LNPs (A) Haemoxyl and Eosin staining (B).

| Post-Transfection After                        | 24 hrs   |             |          |         | 48 hrs   |             |          |         |
|------------------------------------------------|----------|-------------|----------|---------|----------|-------------|----------|---------|
|                                                | $\Psi$ U | $m^1\Psi$ U | $mo^5$ U | $m^5$ C | $\Psi$ U | $m^1\Psi$ U | $mo^5$ U | $m^5$ C |
| % GFP Positive Cells (Fig. S1B)                | NS       | NS          | NS       | NS      | ***      | **          | ***      | ***     |
| Fold Change of % GFP Positive Cells (Fig. S1D) | NS       | NS          | NS       | NS      | ****     | **          | ***      | **      |
| MFI (Fig. S1C)                                 | **       | **          | *        | NS      | ***      | **          | ***      | *       |
| Fold Change of MFI (Fig. S1E)                  | *        | *           | NS       | NS      | ****     | *           | ****     | **      |

**Table S1:** Statistical significance computed using Multiple t-tests for HEK-293T cells transfected with base modified eGFP mRNAs. Each data point was compared with corresponding data for Unmodified (U) eGFP mRNAs. (n = 2); NS – Non-Significant  $p > 0.05$ , \* $p \leq 0.05$ , \*\* $p \leq 0.01$ , \*\*\* $p \leq 0.001$ , \*\*\*\* $p \leq 0.0001$ ). Related to Figure S1.

| Post-Transfection After                       | 24 hrs   |                         |                   |                  | 48 hrs   |                         |                   |                  |
|-----------------------------------------------|----------|-------------------------|-------------------|------------------|----------|-------------------------|-------------------|------------------|
|                                               | $\Psi$ U | m <sup>1</sup> $\Psi$ U | mo <sup>5</sup> U | m <sup>5</sup> C | $\Psi$ U | m <sup>1</sup> $\Psi$ U | mo <sup>5</sup> U | m <sup>5</sup> C |
| % GFP Positive Cells (Fig. 2B)                | *        | **                      | **                | *                | **       | ***                     | ***               | *                |
| Fold Change of % GFP Positive Cells (Fig. 2D) | *        | ***                     | **                | *                | *        | *                       | *                 | *                |
| MFI (Fig. 2C)                                 | *        | ***                     | NS                | *                | **       | ****                    | NS                | *                |
| Fold Change of MFI (Fig. 2E)                  | NS       | **                      | ***               | *                | ***      | ****                    | *                 | *                |

**Table S2:** Statistical significance computed using Multiple t-tests for SK-HEP-1 cell lines transfected with modified eGFP mRNAs. Each data point was compared with corresponding data for U-eGFP mRNA. (n = 2); NS - Non-Significant p > 0.05, \*p ≤ 0.05, \*\*p ≤ 0.01, \*\*\*p ≤ 0.001, \*\*\*\*p ≤ 0.0001). Related to Figure 2.

| Post-Transfection After                       | 24 hrs   |                         |                   |                  | 48 hrs   |                         |                   |                  |
|-----------------------------------------------|----------|-------------------------|-------------------|------------------|----------|-------------------------|-------------------|------------------|
|                                               | $\Psi$ U | m <sup>1</sup> $\Psi$ U | mo <sup>5</sup> U | m <sup>5</sup> C | $\Psi$ U | m <sup>1</sup> $\Psi$ U | mo <sup>5</sup> U | m <sup>5</sup> C |
| % GFP Positive Cells (Fig. 3B)                | NS       | *                       | NS                | NS               | **       | ***                     | *                 | **               |
| Fold Change of % GFP Positive Cells (Fig. 3D) | *        | NS                      | NS                | NS               | **       | **                      | **                | ****             |
| MFI (Fig. 3C)                                 | **       | **                      | NS                | *                | **       | ***                     | *                 | **               |
| Fold Change of MFI (Fig. 3E)                  | *        | ***                     | NS                | ****             | **       | ***                     | **                | ***              |

**Table S3:** Statistical significance computed using Multiple t-tests for Hepa 1-6 cell lines transfected with modified eGFP mRNA. Each data point was compared with corresponding data for U-eGFP mRNA. (n = 2); NS - Non-Significant p > 0.05, \*p ≤ 0.05, \*\*p ≤ 0.01, \*\*\*p ≤ 0.001, \*\*\*\*p ≤ 0.0001). Related to Figure 3.
